# Supplementary material for: Simultaneous microwave-assisted reduction and B/N co-doping of graphene oxide for selective recognition of VOCs
Source: Royal Society of Chemistry journal article supplement (doi:10.1039/d1tc05453h), 2022-01-01
Supplement: d1tc05453h1.pdf [file d1tc05453h1.pdf]

## Supplementary Information

### Simultaneous microwave-assisted reduction and B/N co-doping of graphene oxide for selective recognition of VOCs

Joyce B. Matsoso<sup>1,2\*</sup>, Nikolas Antonatos<sup>1</sup>, Pradip Roy Kumar<sup>1</sup>, Cameron Jellett<sup>1</sup>, Vlastimil Mazánek<sup>1</sup>, Catherine Journet-Gautier<sup>2</sup>, Zdeněk Sofer<sup>1\*</sup>

<sup>1</sup> Department of Inorganic Chemistry, University of Chemistry and Technology Prague, Technická 5, 166 28 Prague 6, Czech Republic

<sup>2</sup> Laboratoire des Multimatériaux et Interfaces, UMR CNRS 5615, Univ-Lyon, Université Claude Bernard Lyon 1, F-69622 Villeurbanne Cedex-France

### Results:

Concentrations of methanol and ethanol vapours ( $C$ ) were determined from the amount of acetone and ethanol, added to the analysis chamber through the equation:

$$C_{ppm} = \frac{2.46V_a\rho}{V_cMw} 10^7 \dots\dots\dots (S1)$$

where  $V_a$  represents the volume (in  $\mu\text{L}$ ) of the analyte added to the chamber,  $V_c$  is the volume (in mL) of the analysis chamber,  $\rho$  is the density of analyte (in  $\text{g mL}^{-1}$ ) and  $Mw$  is the molecular weight of analyte in  $\text{g M}^{-1}$ . The response ( $Resp$ ), limit of detection ( $LoD$ ) and sensitivity ( $S$ ) were given by

$$\Delta R/R_0 = (R_f - R_0)/R_0 \dots\dots\dots (S2)$$

$$LoD = Rb + 3db \dots\dots\dots (S3)$$

$$S = dResp/dC \dots\dots\dots (S4)$$

where,  $R_f$  is the impedance of the sensor when exposed to analyte and  $R_0$  the resistance of the sensor in ambient condition,  $Rb$  is the average impedance,  $db$  is the standard deviation of the device impedance without analyte, and  $C$  is an analyte concentration.

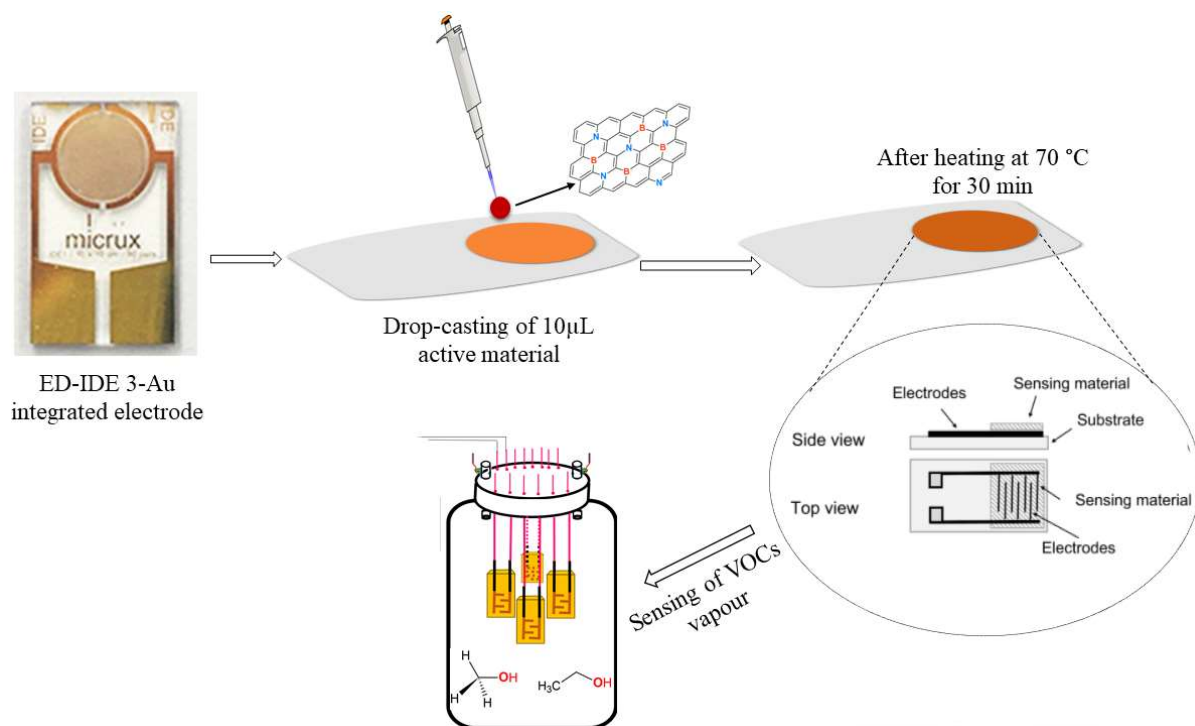

**Scheme S1:** Sensing device preparation and sensing set-up.

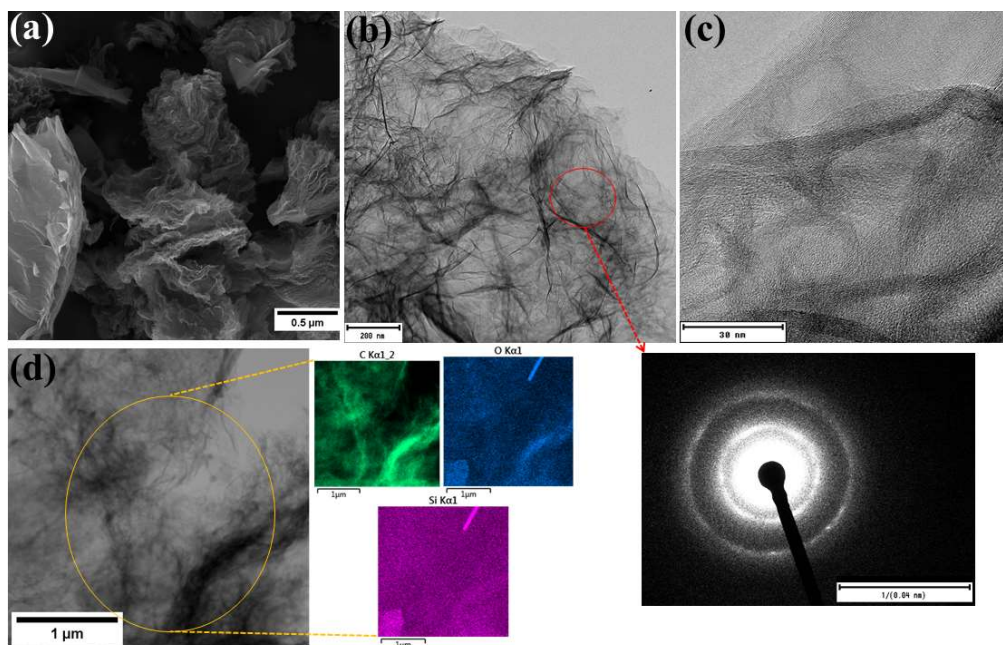

**Figure S1:** Morphology of the rGO sample based on (a) SEM, (b) low magnification TEM, (c) high magnification TEM with SAED, and (d) TEM elemental mapping.

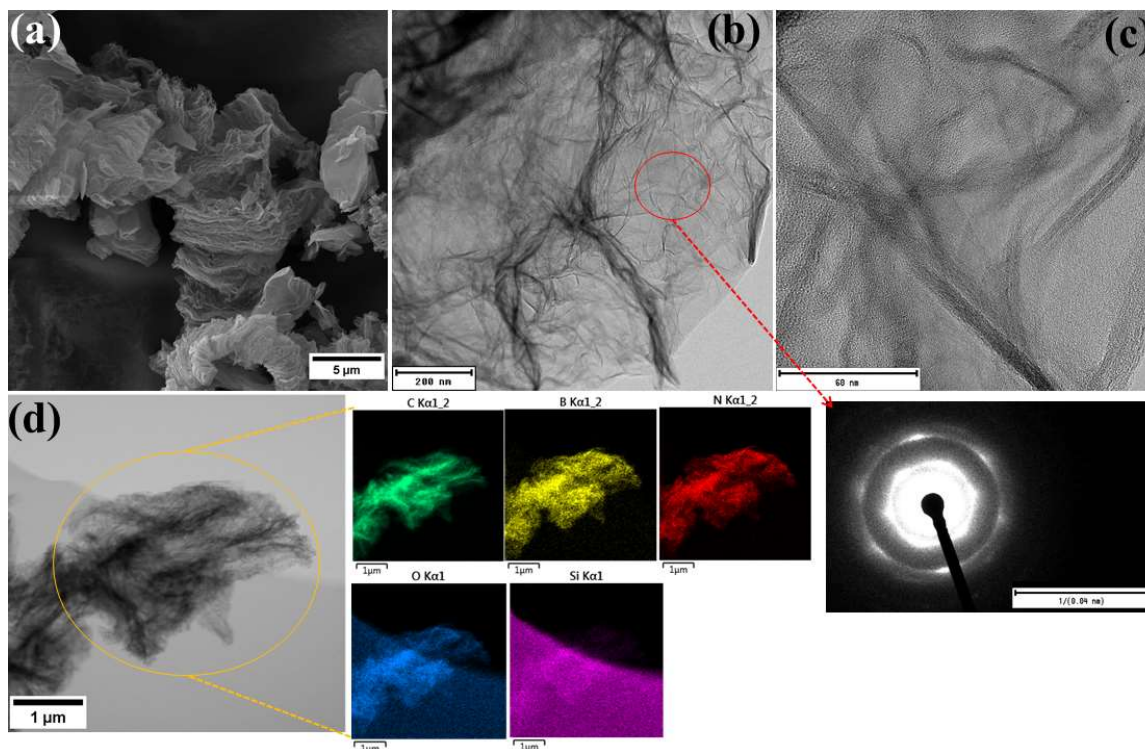

**Figure S2:** Morphology of the BN-GO<sub>TMABH</sub> sample based on (a) SEM, (b) low magnification TEM, (c) high magnification TEM with SAED, and (d) TEM elemental mapping.

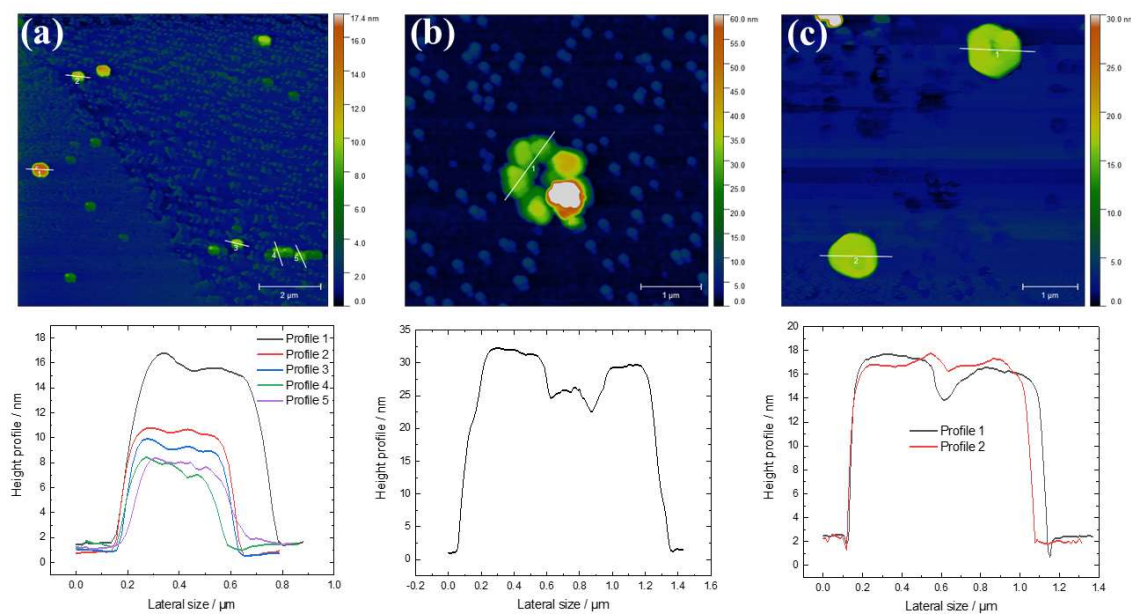

**Figure S3:** AFM micrographs of (a) pristine rGO, (b) BN-rGO<sub>AB</sub>, and (c) BN-GO<sub>TMABH</sub> samples; corresponding height profiles.

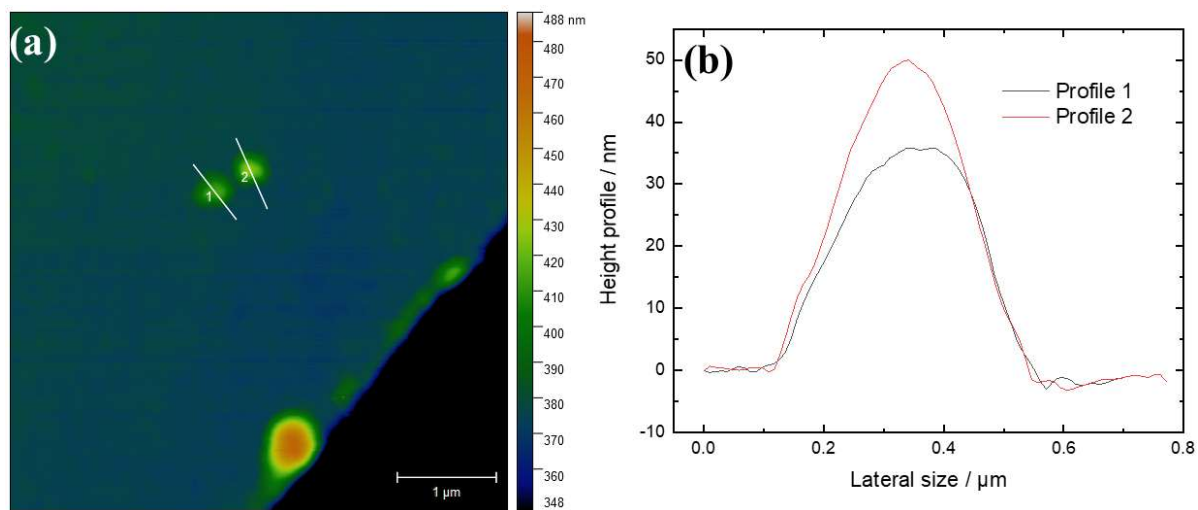

**Figure S4:** (a) AFM micrographs and (b) corresponding height profiles of the nanosheets on the integrated electrode.

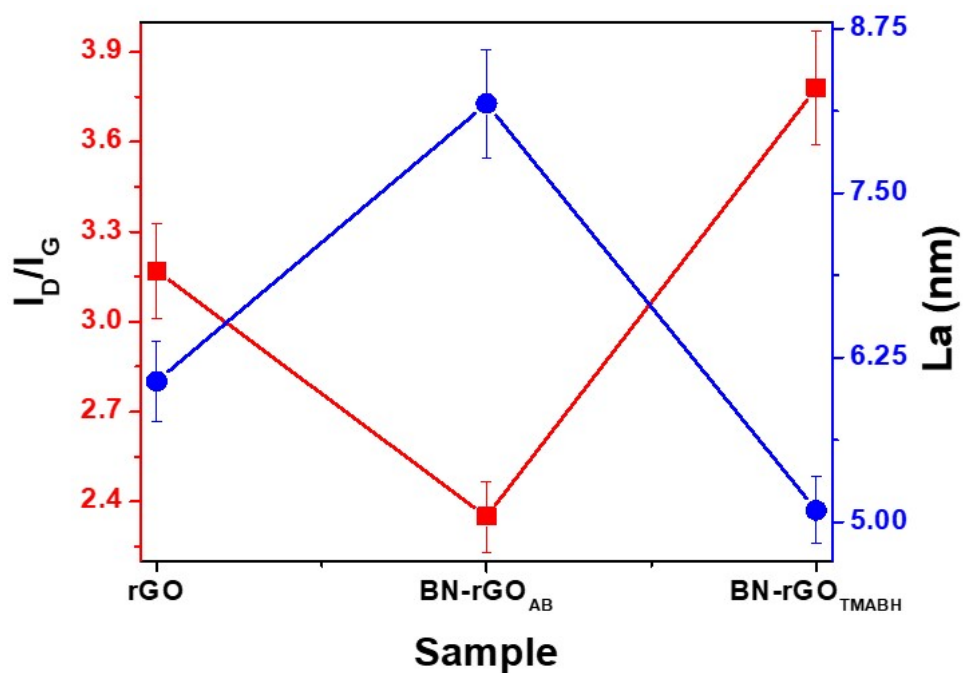

**Figure S5:** Defect density ratios and crystallite sizes for the pristine and variously co-doped rGO samples.

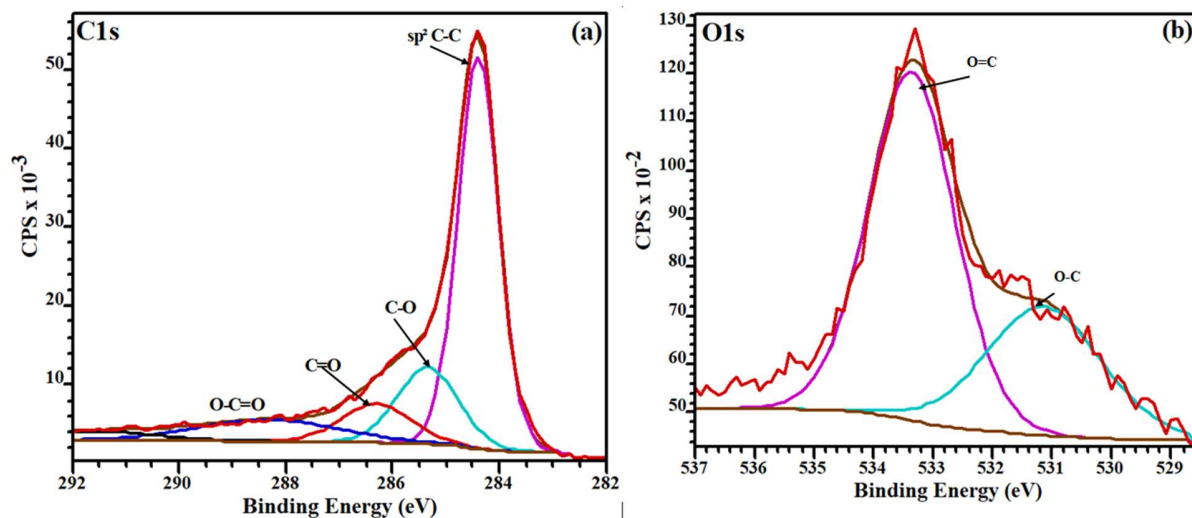

**Figure S6:** Deconvoluted (a) C1s and (b) O1s spectra of rGO sample.

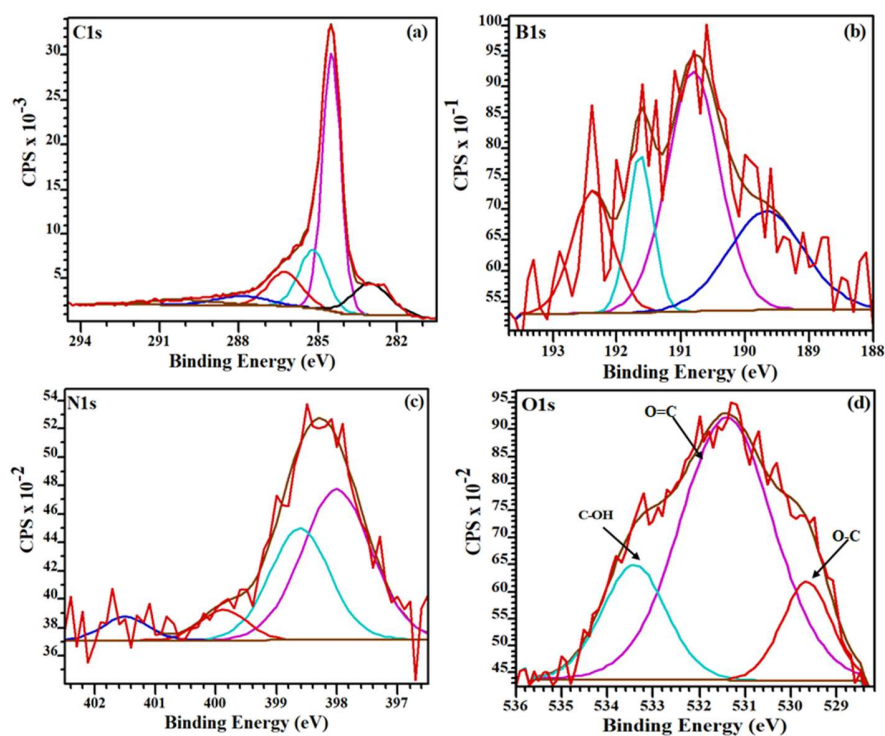

**Figure S7:** Deconvoluted (a) C1s, (b) B1s, (c) N1s, and (d) O1s spectra of BN-rGO<sub>TMA BH</sub> sample.



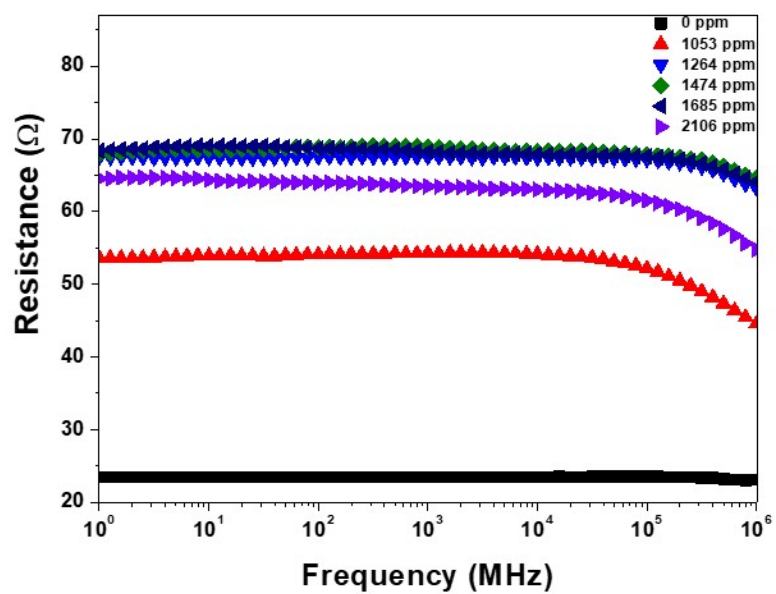

**Figure S8:** (a) Resistance as a function of frequency at increasing EtOH vapour concentration and (b) Nyquist plot for BN-rGO<sub>AB</sub> sensor at 1100 ppm EtOH vapour concentration.

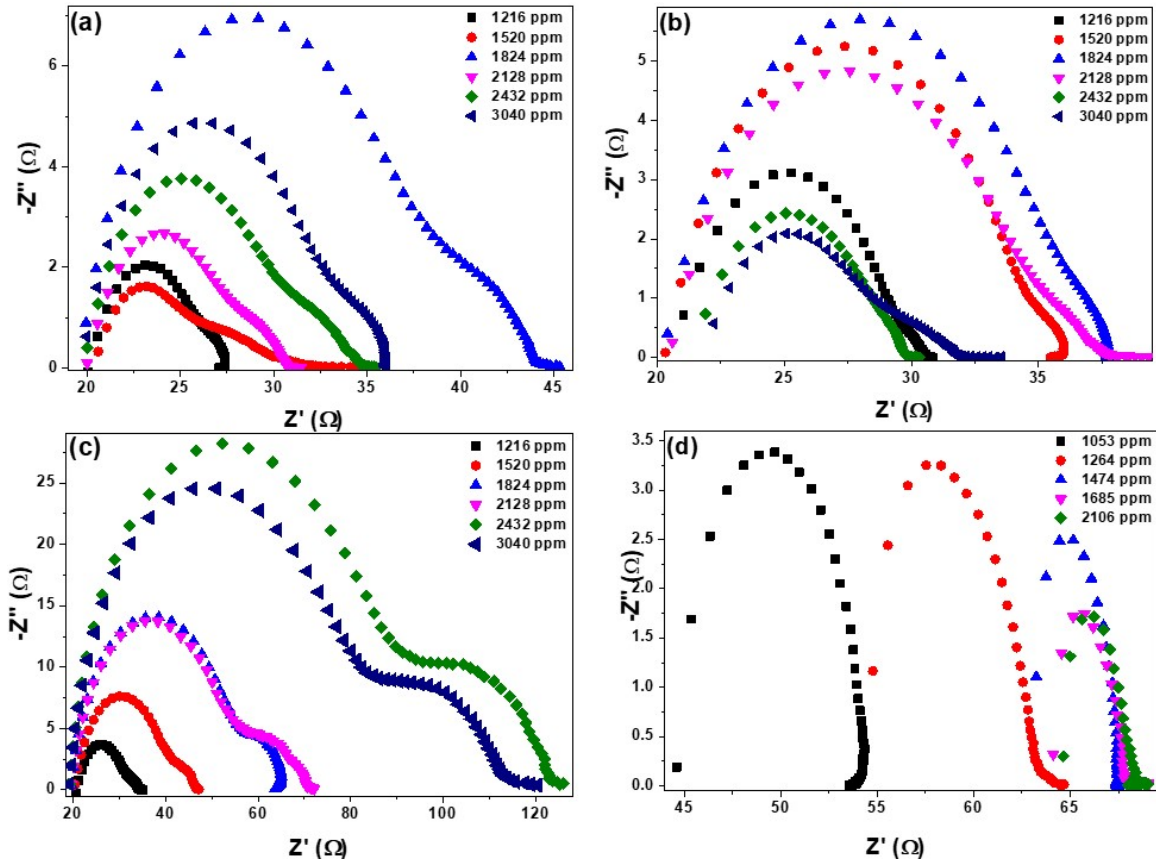

**Figure S9:** Nyquist plots for sensitivity of (a) rGO, (b) BN-rGO<sub>AB</sub>, and (c) BN-rGO<sub>TMABH</sub> sensor devices with increasing MeOH vapour concentrations, and (d) for BN-rGO<sub>AB</sub> to EtOH vapour.

**Table S1:** Raman parameters for the pristine rGO and doped rGO samples.

| Sample                  | Peak position (cm <sup>-1</sup> ) |        | Defect density ratio (I <sub>D</sub> /I <sub>G</sub> ) | L <sub>a</sub> (nm) | N <sub>D</sub> / ×10 <sup>11</sup> cm <sup>-2 a</sup> |
|-------------------------|-----------------------------------|--------|--------------------------------------------------------|---------------------|-------------------------------------------------------|
|                         | D-band                            | G-band |                                                        |                     |                                                       |
| rGO                     | 1349.8                            | 1584.3 | 3.17                                                   | 6.07                | 9.50                                                  |
| BN-rGO <sub>AB</sub>    | 1349.9                            | 1584.3 | 2.35                                                   | 8.18                | 7.04                                                  |
| BN-rGO <sub>TMABH</sub> | 1344.8                            | 1577.9 | 3.78                                                   | 5.09                | 11.3                                                  |

Defects density,  $n_D$  (nm) =  $\frac{2.4 \times 10^{22}}{\lambda_{laser}^4} \times I_D/I_G \dots \dots \dots (S1^a)$

**Table S2:** Textual properties of pristine and doped rGO samples.

| <b>Sample</b>                 | <b>BET surface area (m<sup>2</sup>/g)</b> | <b>Monolayer Pore volume (cm<sup>3</sup>/g)</b> | <b>Pore vol (cm<sup>3</sup>/g)</b> |
|-------------------------------|-------------------------------------------|-------------------------------------------------|------------------------------------|
| <b>rGO</b>                    | 185.8                                     | 42.7                                            | 0.77                               |
| <b>BN-rGO<sub>AB</sub></b>    | 432.6                                     | 99.8                                            | 1.94                               |
| <b>BN-rGO<sub>TMABH</sub></b> | 325.4                                     | 74.8                                            | 1.50                               |

**Table S3:** Atomic compositions of pristine and BN-rGO samples.

| <b>Samples</b>                | <b>Elements (at. %)</b> |          |          |          |
|-------------------------------|-------------------------|----------|----------|----------|
|                               | <b>C</b>                | <b>B</b> | <b>N</b> | <b>O</b> |
| <b>rGO</b>                    | 93.02                   | -        | -        | 6.98     |
| <b>BN-rGO<sub>AB</sub></b>    | 75.69                   | 7.33     | 2.61     | 14.48    |
| <b>BN-rGO<sub>TMABH</sub></b> | 84.87                   | 2.94     | 2.09     | 10.09    |
